# Supplementary material for: Ruthenium(II) complex with a notably long excited state lifetime
Source: Royal Society of Chemistry journal article supplement (doi:10.1039/b007336i), 2000-01-01
Supplement: b007336i.doc [file b007336i.doc]

**Supporting Information:**

**Ruthenium(II) complex with a notably long excited state lifetime**

Daniel S. Tyson, Jason Bialecki, and Felix N. Castellano*

**General.** All synthetic manipulations were performed under an inert and dry argon atmosphere using standard techniques. Anhydrous THF, anhydrous ether, 2,2’-bipyridine (bpy), 1,10-phenanthroline (phen), *n*-butyllithium (1.6 M in hexanes), Pd(PPh3)4, barium hydroxide, and triisopropyl borate were obtained from Aldrich and used as received. All other reagents and materials from commercial sources were used as received. Ru(bpy)2Cl21 and Ru(DMSO)4Cl22 were prepared according to published procedures.

1H NMR spectra were recorded on a Varian Gemini 200 (200 MHz) spectrometer. All chemical shifts are referenced to residual solvent signals previously referenced to TMS and splitting patterns are designated as s (singlet), d (doublet), t (triplet), q (quartet), m (multiplet), and br (broad). GC and DIP mass spectra were measured in-house using a Shimadzu QP5050A spectrometer. FAB mass spectra were measured at the University of Maryland College Park Mass Spectrometry Laboratory. Elemental analyses were obtained at the Analytical Facilities, University of Toledo.

**Syntheses. 5-bromo-1,10-phenanthroline.** This compound was prepared according to a published procedure.3 1H NMR (CDCl3):  9.23 (q, 2H), 8.69 (dd, 1H), 8.20 (dd, 1H), 8.17 (s,1H). MS (GC): *m/z* 258/260 M+.

**3-bromopyrene.** This compound was prepared as described in the literature.4 m.p. 93.5-95.5C (Lit. 94.5-95.5C ). 1H NMR (d6-acetone):  8.46-8.31 (br m, 5H), 8.27-8.09 (br m, 4H). MS (DIP): *m/z* 280/282 M+.

**3-pyreneboronic acid.** 3-bromopyrene (2.00 g, 7.12 mmol) was dissolved in a mixture of dry THF (150 mL) and dry ether (150 mL). The pale yellow solution was cooled to –78ºC under argon. 1.6 M *n*-Butyllithium (4.9 mL, 7.83 mmol) in hexanes was added dropwise with stirring to produce a bright yellow solution which slowly became cloudy. The mixture was held at -78ºC for 10 min, at -10ºC for 10 min, and at -78ºC for 30 min. Triisopropyl borate (4.93 mL, 21.36 mmol) was then added dropwise. The reaction was held at -78ºC for 30 min and slowly became yellow-orange and clear. The solution was warmed to 0ºC for 3 hr during which time it became cloudy yellow. The mixture was slowly brought to ambient temperature and was held at room temperature for 1.5 days. Water (100 mL) was added to the reaction vessel and vigorously stirred for 1 hr. The aqueous layer was extracted with ether (2 x 25 mL) and the combined organic layers were washed with water (2 x 50 mL), dried over MgSO4, filtered, and rotary evaporated to dryness to yield the solid product which was used without further purification (1.43 g, 82% yield). 1H NMR (CDCl3):  8.30-8.17 (br m, 4H), 8.14-7.98 (br m, 5H). MS (DIP): *m/z* 246 M+.

**5-pyrenyl-1,10-phenanthroline (py-phen).** 5-bromo-1,10-phenanthroline (191 mg, 0.74 mmol) and 3-pyrene boronic acid (200 mg, 0.81 mmol) were dissolved in 30 mL toluene and 10 mL ethanol. The yellow solution was degassed with Ar for 30 min. A saturated aqueous solution of Ba(OH)2 (40 mL) was added and the biphasic mixture was degassed an additional 30 min. Pd(PPh3)4 (34.7 mg, 0.03 mmol) was added and the reaction mixture refluxed with vigorous stirring under Ar for 2 days. Once cool, the layers were separated and the aqueous layer was extracted with toluene (3 x 10 mL) and the combined organic extracts were washed with water (3 x 20 mL). The organic fractions were dried over MgSO4, filtered, and rotary evaporated to a brown oily residue. The oil was triturated with chloroform, petroleum ether added, and the mixture was chilled to promote further crystallization. The light yellow product was collected as a solid by vacuum filtration on a Buchner funnel (194 mg, 63% yield). This solid decomposed above 245C. Anal. Calcd for C28H16N2: C, 88.39; H, 4.23; N, 7.36. Found: C, 86.56; H, 4.18; N, 6.76. 1H NMR (d6-acetone):  9.21 (dd, 1H), 9.13 (dd, 1H), 8.53 (dd, 1H), 8.47 (d, 1H), 8-8.4 (br m, 8H), 7.82 (q, 1H), 7.75 (dd, 1H), 7.68 (d, 1H), 7.54 (q, 1H). MS (DIP): *m/z* 380 M+.

**Tris(5-pyrenyl-1,10-phenanthroline)ruthenium(II) hexafluorophosphate, [Ru(py-phen)3](PF**6**)**2**.** Ru(DMSO)4Cl2 (33.8 mg, 0.070 mmol) and 5-pyrenyl-1,10-phenanthroline (87.4 mg, 0.230 mmol) were dissolved in 95% ethanol (10 mL), protected from light, and refluxed for 24 hours under Ar. This solution was cooled to room temperature, 5 mL H2O was added, and the mixture was filtered. Excess NH4PF6(aq) was added and a dark orange solid immediately precipitated. The solid was filtered through a fine glass frit and washed with water followed by ether to afford the crude product. The complex was purified by column chromatography on Sephadex LH-20 (25x2 cm, MeOH) and precipitated with the addition of concentrated NH4PF6 (aq) (45 mg, 46% yield). Anal. Calcd for C84H48N6RuP2F12.6H2O: C, 62.33; H, 3.60; N, 5.01. Found: C, 61.54; H, 3.13, N, 5.09. MS (FAB): *m/z* 1387.4 [M - PF6]+, 1242.4 [M - 2PF6]2+.

**Physical Measurements.** Absorption spectra were measured with a Hewlett Packard 8453 diode array spectrophotometer, accurate to + 2 nm. Static luminescence spectra were obtained with a single photon counting spectrofluorimeter from Edinburgh Analytical Instruments (FL/FS 900). The temperature in the fluorimeter was maintained at 20 + 1ºC for all measurements with a Neslab RTE-111 circulating bath. Excitation spectra were corrected with a photodiode mounted inside the fluorimeter that continuously measures the Xe lamp output. Frozen glass emission samples at 77 K were prepared by inserting a 5 mm (internal diameter) NMR tube containing a 10-5 M solution (butyronitrile or 4:1 EtOH:MeOH) of the appropriate complex into a quartz-tipped finger dewar of liquid nitrogen. Luminescence quantum yields were referenced to [Ru(bpy)3]2+ in CH3CN (r = 0.062), as described previously.5 All photophysical experiments used optically dilute solutions (OD = 0.09-0.11) prepared in spectroscopic grade CH3CN (Burdick and Jackson) unless otherwise stated. All luminescence samples in 1 cm2 anaerobic quartz cells (Starna Cells) were deoxygenated with solvent-saturated argon for at least 30 minutes prior to measurement. All transient absorption measurements were conducted at the ambient temperature, 22  2 oC.

Emission lifetimes were measured with an apparatus described previously,5 using a nitrogen-pumped broadband dye laser (PTI GL-3300 N2 laser, PTI GL-301 dye laser, Coumarin 460 dye) as the excitation source. Pulse energies were typically attenuated to ~ 100 J/pulse, measured with a Molectron Joulemeter (J4-05). An average of 128 transients were collected, transferred to a computer, and processed using Origin 6.0.

**Laser Flash Photolysis.** Nanosecond time-resolved absorption spectroscopy was performed using instrumentation that has been described previously.5 The excitation source was the unfocused second harmonic (532 nm, 7 ns fwhm) or third harmonic (355 nm, 7 ns fwhm) output of a Nd:YAG laser (Continuum Surelite I). In other cases excitation at 450 nm was accomplished using an OPOTEK Magic Prism optical parametric oscillator pumped by the third harmonic of the Nd:YAG laser. Typical excitation energies were a few millijoules per pulse. The probe lamp was filtered of all deep UV-output through the use of two long-pass filters in parallel (LP295 and LP305) prior to sample illumination. Samples were continuously purged with a stream of high purity argon or nitrogen gas throughout the experiments. The data, consisting of a 10-shot average of both the signal and the baseline, were analyzed with programs of local origin. The electronic spectra of each compound before and after transient absorption measurements were the same within experimental error, indicating no sample decomposition during the data acquisition.

**References (Supporting Information)**

1. B.P. Sullivan, D.J. Salmon and T.J. Meyer, *Inorg. Chem.,* 1978, **17**, 3334.
2. I.P. Evans, A. Spencer and G. Wilkinson, *J. Chem. Soc. Dalton Trans.,* 1973, 204.
3. M. Hissler, W.B. Connick, D.K. Geiger, J.E. McGarrah, D. Lipa, R.J. Lachicotte and R. Eisenberg, *Inorg. Chem.,* 2000, **39**, 447.
4. W.H. Gumprecht *Organic Synth.,* 1968, *48*, 30.
5. D.S. Tyson and F.N. Castellano, *J. Phys. Chem. A,* 1999, **103**, 10955.

**Figure S1.** Self-quenching plot of [Ru(py-phen)3]2+ as a function of concentration in CH3CN at room temperature.

**Figure S2.** Excited state absorption difference spectra for py-phen in deaerated CH3CN recorded at 600 ns (filled squares), 29 s (filled circles), and 64 s (filled triangles) following 355 nm pulsed excitation.

**Figure S3.** Excited state absorption spectra for [Ru(py-phen)3]2+ in deaerated CH3CN recorded at 500 ns (filled squares), 1.4 s (filled circles), 50 s (filled triangles), 74 s (filled upside-down triangles), and 120 s (filled diamonds) following 458 nm pulsed excitation.
